# Supplementary material for: An Analysis of Economic Burden of Hypertensive Patients Based on “System of Health Accounts 2011” and Multiple Layer Perceptron Neural Network
Source: Research Square preprint supplement (doi:10.21203/rs.3.rs-127376/v1), 2020-12-16
Supplement: Supplementary file 1 [file 2ce2050bee63b2f566805b77.docx]

Table 4 Neural network structure and result

| Parameter(1) | Parameter(2) | Inpatient | Outpatient |
| --- | --- | --- | --- |
| Input layer | Independent variables | X1 to X15 | X1 to X12 |
|  | Number of neurons | 15 | 12 |
|  | Rescaling methods for  independent variables | Standardized | Standardized |
| Hidden layer(s) | Number of hidden layers | 1 | 1 |
|  | Number of neurons in hidden layer | 9 | 8 |
|  | Activation function | Hyperbolic tangent | Hyperbolic tangent |
| Output layer | Dependent variable(s) | 1 | 1 |
|  | Number of neurons | 1 | 1 |
|  | Activation function | Identity function | Identity function |
|  | Error function | Sum of squares | Sum of squares |
| Result | Sample size | 14763 | 180441 |
|  | Training set/testing set | 70.5:29.5 | 70:30 |
|  | Training relative error | 12.7% | 7.1% |
|  | Testing relative error | 6.3% | 3.1% |
|  | standardized importance of variables (top 3) | drug fee(100.0%)  surgical fee(85.2%)  hospitalization days (59.2%) | drug fee(100.0%)  examination fee(33.8%)  test fee(22.2%) |

This table should appear on page 10, line 15 of the manuscript.
